# Supplementary material for: ProbResist: a database for drug-resistant probiotic bacteria
Source: Oxford University Press journal article supplement (doi:10.1093/database/baac064), 2022-01-01
Supplement: baac064_supp.zip [file baac064_supp.zip]

## Supplementary data

### Title

ProbResist: a database for drug resistant probiotic bacteria

### Authors

Wanying Dou<sup>1</sup>, Hemn Barzan Abdalla<sup>1</sup>, Xu Chen<sup>1</sup>, Changyi Sun<sup>2</sup>, Xuefei Chen<sup>2</sup>, Qiwen Tian<sup>2</sup>, Junyi Wang<sup>2</sup>, Wei Zhou<sup>2</sup>, Wei Chi<sup>2</sup>, Xuan Zhou<sup>2</sup>, Hailv Ye<sup>2</sup>, Chuyun Bi<sup>2,3,4</sup>, Xuechen Tian<sup>3,4</sup>, Yixin Yang<sup>3,4</sup>, and Aloysius Wong<sup>2,3,4,\*</sup>

### Affiliations

<sup>1</sup> Department of Computer Science, College of Science and Technology, Wenzhou-Kean University, 88 Daxue Road, Ouhai, Wenzhou, Zhejiang Province, 325060 China

<sup>2</sup> Department of Biology, College of Science and Technology, Wenzhou-Kean University, 88 Daxue Road, Ouhai, Wenzhou, Zhejiang Province, 325060 China

<sup>3</sup> Wenzhou Municipal Key Lab for Applied Biomedical and Biopharmaceutical Informatics, Ouhai, Wenzhou, Zhejiang Province, 325060 China

<sup>4</sup> Zhejiang Bioinformatics International Science and Technology Cooperation Center, Ouhai, Wenzhou, Zhejiang Province, 325060 China

\* To whom correspondence should be addressed.

### Keywords

Probiotics, Antibiotic resistance, Drug resistance, Multidrug resistance, Antibiotic resistance genes, Horizontal gene transfer

27 **Supplementary Table S1.** Keywords and metrics underlying the ProbResist database

| Keywords used to search for articles in PubMed                                                                                                                                                                                                                                                                                                                                                                                                                                                                                                                                                                                                                                                                                               | No. of articles retrieved from PubMed* | Types of bacteria (No. of times reported)                                                                                                                   | Drug resistance (No. of times reported)                                                                                                                                                                  | Region/Country (No. of articles)                                                                                                        |
|----------------------------------------------------------------------------------------------------------------------------------------------------------------------------------------------------------------------------------------------------------------------------------------------------------------------------------------------------------------------------------------------------------------------------------------------------------------------------------------------------------------------------------------------------------------------------------------------------------------------------------------------------------------------------------------------------------------------------------------------|----------------------------------------|-------------------------------------------------------------------------------------------------------------------------------------------------------------|----------------------------------------------------------------------------------------------------------------------------------------------------------------------------------------------------------|-----------------------------------------------------------------------------------------------------------------------------------------|
| 'Lactobacillus', 'Bifidobacteria', 'Pediococcus', 'Weissella', 'Lactococcus', 'Streptococcus', 'Bacillus', 'Holzapfelia', 'Amylolactobacillus', 'Bombilactobacillus', 'Companilactobacillus', 'Lapidilactobacillus', 'Agrilactobacillus', 'Schleiferilactobacillus', 'Loigolactobacillus', 'Lacticaseibacillus', 'Latilactobacillus', 'Dellaglio', 'Liquorilactobacillus', 'Ligilactobacillus', 'Lactiplantibacillus', 'Furfurilactobacillus', 'Paucilactobacillus', 'Limosilactobacillus', 'Fructilactobacillus', 'Acetilactobacillus', 'Apilactobacillus', 'Levilactobacillus', 'Secundilactobacillus', 'Lentilactobacillus', 'Lactobacillaceae', 'Leuconostocaceae', and/or 'Probiotics' and 'Antibiotic resistance' or 'Drug resistance' | 158                                    | Lactobacillus (744)<br>Bifidobacterium (81)<br>Pediococcus (44)<br>Weissella (36)<br>Lactococcus (23)<br>Streptococcus (18)<br>Bacillus (13)<br>Others (23) | Tetracycline (91)<br>Erythromycin (70)<br>Vancomycin (63)<br>Streptomycin (60)<br>Chloramphenicol (47)<br>Kanamycin (40)<br>Ampicillin (37)<br>Gentamycin (36)<br>Ciprofloxacin (32)<br>Clindamycin (30) | China (22)<br>Belgium (20)<br>Italy (19)<br>USA (10)<br>Spain (10)<br>France (8)<br>India (8)<br>Sweden (7)<br>Germany (6)<br>Egypt (5) |

28 \* As of May 2022, and after the removal of duplicates. Each article is then manually assessed to determine suitability for inclusion in ProbResist.

29 Only the top 10 items in each category are shown in this table. For further and updated information, please refer to the analysis tabs on the  
30 webserver <https://probresist.com>.
