# Supplementary material for: ProbResist: a database for drug-resistant probiotic bacteria
Source: Oxford University Press journal article supplement (doi:10.1093/database/baac064), 2022-01-01
Supplement: baac064_supp.zip [file baac064_supp.zip]

Archive with 1 entries (1 files):
- Supplementary data.pdf
